# Supplementary material for: Cardiac Magnetic Resonance, Electromechanical Activation, Kidney Function, and Natriuretic Peptides in Cardiac Resynchronization Therapy Upgrades
Source: MDPI journal article supplement (doi:10.3390/jcdd10100409), 2023-09-22
Supplement: s1 [file s1]

**Table S1: Logistic Regression Model**

| Logistic Regression Model |       |            |        |            |          |                |       |               |       |
|---------------------------|-------|------------|--------|------------|----------|----------------|-------|---------------|-------|
|                           |       | Model      |        | Likelihood |          | Discrimination |       | Rank Discrim. |       |
|                           |       |            |        | Ratio Test |          | Indexes        |       | Indexes       |       |
| Obs                       | 102   | LR chi2    |        | 34.33      |          | R2             | 0.463 | C             | 0.871 |
| 0                         | 83    | d.f.       |        | 4          |          | R2(4,102)      | 0.257 | Dxy           | 0.743 |
| 1                         | 19    | Pr(> chi2) |        | <0.0001    |          | R2(4,46.4)     | 0.480 | gamma         | 0.743 |
| max  deriv                | 7e-07 |            |        |            |          | Brier          | 0.097 | tau-a         | 0.227 |
|                           |       | Coef       | S.E.   | wald Z     | Pr(> Z ) |                |       |               |       |
| Intercept                 |       | -4.4023    | 1.1999 | -3.67      | 0.0002   |                |       |               |       |
| BNPB                      |       | 0.0008     | 0.0003 | 2.36       | 0.0180   |                |       |               |       |
| Creatinine                |       | 1.8155     | 0.7447 | 2.44       | 0.0148   |                |       |               |       |
| CABG                      |       | 1.4198     | 0.6863 | 2.07       | 0.0386   |                |       |               |       |
| CMR.MAGE34                |       | -1.4343    | 0.6943 | -2.07      | 0.0388   |                |       |               |       |

**Table S2: Cox Proportional Hazards Regression Model #1**

```
Cox Proportional Hazards Model #1
n= 102, number of events= 26

      coef    exp(coef)    se(coef)      z    Pr(>|z|)
Creatinine  1.7545023    5.7805701    0.3907157    4.490  7.11e-06 ***
BNPB        0.0004698    1.0004699    0.0001878    2.502   0.0124 *
CABG        1.0960313    2.9922671    0.4697240    2.333   0.0196 *
CMR.MAGE34 -0.9403157    0.3905045    0.4583849   -2.051   0.0402 *
---
Signif. codes:  0 '***' 0.001 '**' 0.01 '*' 0.05 '.' 0.1 ' ' 1

      exp(coef) exp(-coef) lower .95 upper .95
Creatinine     5.7806      0.1730      2.688    12.432
BNPB           1.0005      0.9995      1.000      1.001
CABG           2.9923      0.3342      1.192      7.513
CMR.MAGE34     0.3905      2.5608      0.159      0.959

Concordance= 0.817 (se = 0.044 )
Likelihood ratio test= 42.64 on 4 df,  p=1e-08
Wald test               = 35.9 on 4 df,  p=3e-07
Score (logrank) test = 67.14 on 4 df,  p=9e-14
```

**Table S3: Cox Proportional Hazards Model #2**

```
Cox Proportional Hazards Model #2
n= 102, number of events= 26

      coef      exp(coef) se(coef)      z  Pr(>|z|)
SHFMM      1.0319      2.8064   0.3744   2.756  0.00585 **
CMR.MAGE34 -0.8043      0.4474   0.4075  -1.974  0.04843 *
---
Signif. codes:  0 '***' 0.001 '**' 0.01 '*' 0.05 '.' 0.1 ' ' 1

      exp(coef) exp(-coef) lower .95 upper .95
SHFMM      2.8064      0.3563   1.3473   5.8458
CMR.MAGE34  0.4474      2.2351   0.2013   0.9945

Concordance= 0.709 (se = 0.052 )
Likelihood ratio test= 13.45 on 2 df,  p=0.001
Wald test               = 12.91 on 2 df,  p=0.002
Score (logrank) test = 13.65 on 2 df,  p=0.001
```
